# Supplementary material
Source: HighWire-hosted journal article supplement (http://ajnr-stage2.highwire.org/highwire/filestream/66248/field_highwire_adjunct_files/0/18-01073.pdf)
Supplement: 18-01073.pdf [file 18-01073.pdf]

**On-line Table 1: Search syntax**

| PubMed Search Accessed on September 1, 2018 (89 Articles)                                                                                                                                                                            | EMBASE Search Accessed on September 1, 2018 (43 Articles)                                                                     | MEDLINE Search Accessed on September 1, 2018 (83 Articles)                                                                              |
|--------------------------------------------------------------------------------------------------------------------------------------------------------------------------------------------------------------------------------------|-------------------------------------------------------------------------------------------------------------------------------|-----------------------------------------------------------------------------------------------------------------------------------------|
| ((flow diversion OR flow diverter)) AND Acom aneurysms<br>(((flow diversion OR flow diverter)) AND anterior communicating artery aneurysms)<br>((PIPELINE OR SILK OR SURPASS OR FRED)) AND (anterior communicating artery aneurysms) | 'flow diverter' AND 'anterior communicating artery aneurysm'<br>'flow diversion' AND 'anterior communicating artery aneurysm' | ((flow diversion or flow diverter) and acom).af.<br>((flow diversion or flow diverter) and anterior communicating artery aneurysms).af. |

On-line Table 2: Summary of studies included in meta-analysis

| Study Name                                            | Design | No. of Aneurysms Treated with FD | Type of FD Stent | Successful Stent Deployment    | Overall Complete/Near-Complete Occlusion | Overall Rate of Treatment-Related Complications | Description of Complication                                                                                                                                    | Quality of Studies (NOS) |
|-------------------------------------------------------|--------|----------------------------------|------------------|--------------------------------|------------------------------------------|-------------------------------------------------|----------------------------------------------------------------------------------------------------------------------------------------------------------------|--------------------------|
| Pistocchi et al 2012 <sup>22</sup>                    | R      | 16                               | Silk             | 16/16                          | 12/14                                    | 1/16                                            | Transient hemiparesis due to slow flow of covered A2                                                                                                           |                          |
| Toma et al 2013 <sup>25</sup>                         | R      | 7                                | PED              | 7/7                            | NA                                       | 2/7                                             | 2 In-stent thromboses with permanent neurologic deficits                                                                                                       |                          |
| Saleme et al 2014 <sup>23</sup>                       | R      | 9                                | PED              | 9/9                            | 9/9                                      | NA                                              | NA                                                                                                                                                             |                          |
| Gawlitza et al 2016 <sup>19</sup>                     | R      | 5                                | 4 PEDs, 1 FRED   | 5/5                            | 5/5                                      | 2/5                                             | 2 Ischemic complications related to the covered artery of Heubner                                                                                              |                          |
| Clarencon et al 2017 <sup>26</sup>                    | R      | 3                                | 1 PED + 2 Silks  | 3/3                            | 3/3                                      | 0/3                                             | NA                                                                                                                                                             |                          |
| Dabus et al 2017 <sup>27</sup>                        | R      | 13                               | PED              | 13/13                          | 11/13                                    | 2/13                                            | 1 Small caudate infarct + 1 severe ICH                                                                                                                         |                          |
| Colby et al 2017 <sup>2</sup>                         | R      | 41                               | PED              | 48/50 (No. of stents deployed) | 29/34                                    | 4/41                                            | 1 Major stroke due to in-stent occlusion 48 hr after treatment + 2 ICHs + 1 transient in-stent thrombosis during treatment, resolved after abciximab injection |                          |
| Möhlenbruch et al 2017 <sup>28</sup>                  | PMC    | 11                               | FRED             | 11/11                          | 6/9                                      | 0/11                                            | NA                                                                                                                                                             |                          |
| Wakhloo et al 2015 <sup>29</sup>                      | PMC    | 12                               | Surpass          | NA                             | 8/9                                      | 0/12                                            | NA                                                                                                                                                             |                          |
| Lin et al (technical success rate) 2018 <sup>30</sup> | R      | 10                               | PED              | 10/10                          | NA                                       | NA                                              | NA                                                                                                                                                             |                          |
| Lin et al (aneurysms retreated) 2017 <sup>14</sup>    | R      | 6                                | PED              | 5/6                            | 5/6                                      | 0/6                                             | NA                                                                                                                                                             |                          |
| Sultan-Qurraie et al 2017 <sup>31</sup>               | R      | 3                                | PED              | 3/3                            | 3/3                                      | 0/3                                             | NA                                                                                                                                                             |                          |
| Pierot et al 2018 <sup>20</sup>                       | PMC    | 9                                | FRED             | 9/9                            | NA                                       | 3/9                                             | 1 Transient ischemic lesion + 1 transient in-stent occlusion + 1 perforation aneurysm                                                                          |                          |
| Lin et al 2018 <sup>32</sup>                          | R      | 3                                | PED              | 3/3                            | NA                                       | NA                                              | NA                                                                                                                                                             |                          |

**Note:**—R indicates retrospective study; P, prospective study; PMC, prospective multicentric study; FD, flow diversion; NA, not available; ICH, intracranial hemorrhage.

**On-line Table 3: Quality measure of included studies by the Newcastle-Ottawa quality-assessment scale—retrospective design (score 0–8)<sup>a</sup>**

| Study Name                                            | Selection |   |   |   | Comparability |   | Exposure |   |   | Total |
|-------------------------------------------------------|-----------|---|---|---|---------------|---|----------|---|---|-------|
|                                                       | 1         | 2 | 3 | 4 | a             | b | 1        | 2 | 3 |       |
| Pistocchi et al 2012 <sup>22</sup>                    | *         | * |   |   |               | * | *        |   |   | 4     |
| Toma et al 2013 <sup>25</sup>                         | *         | * |   |   |               |   | *        |   |   | 3     |
| Saleme et al 2014 <sup>23</sup>                       | *         | * |   |   |               | * | *        |   |   | 4     |
| Gawlitza et al 2016 <sup>19</sup>                     | *         | * |   |   |               | * | *        |   |   | 4     |
| Clarencon et al 2017 <sup>26</sup>                    | *         | * |   |   |               | * | *        |   |   | 4     |
| Dabus et al 2017 <sup>27</sup>                        | *         | * |   |   |               | * | *        |   |   | 4     |
| Colby et al 2017 <sup>2</sup>                         | *         | * |   |   |               | * | *        |   |   | 4     |
| Lin et al (technical success rate) 2018 <sup>30</sup> | *         | * |   |   |               |   | *        |   |   | 3     |
| Lin et al 2018 <sup>32</sup>                          | *         | * |   |   |               |   | *        |   |   | 3     |
| Sultan-Qurraie et al 2017 <sup>31</sup>               | *         | * |   |   |               | * | *        |   |   | 4     |

<sup>a</sup> Newcastle-Ottawa quality-assessment scale for retrospective studies. Studies with  $\geq 5$  asterisks were considered high-quality.

#### Selection

- 1) Is the case definition adequate?
  - a) Yes, with independent validation\*
  - b) Yes, eg, record linkage or based on self-reports
  - c) No description
- 2) Representativeness of the cases
  - a) Consecutive or obviously representative series of cases\*
  - b) Potential for selection biases or not stated
- 3) Selection of controls
  - a) Community controls\*
  - b) Hospital controls
  - c) No description
- 4) Definition of controls
  - a) No history of disease (end point)\*
  - b) No description of source

#### Comparability

- 1) Comparability of cases and controls on the basis of the design or analysis
  - a) Study controls for \_\_\_\_ (select the most important factor)\*
  - b) Study controls for any additional factor.\* (these criteria could be modified to indicate specific control for a second important factor)

Note =

Comparability (point a) was not tested because the design of the reported studies.

Comparability (point b) was tested comparing subgroups of analysis: One point was attributed if the study reported the analysis of the subgroups (aneurysm size, type of stents, and so forth) described in On-line Table 6.

#### Exposure

- 1) Ascertainment of exposure
  - a) Secure record (eg, surgical records)\*
  - b) Structured interview where blind to case/control status\*
  - c) Interview not blinded to case/control status
  - d) Written self-report or medical record only
  - e) No description
- 2) Same method of ascertainment for cases and controls
  - a) Yes\*
  - b) No
- 3) Nonresponse rate
  - a) Same rate for both groups\*
  - b) Nonrespondents described
  - c) Rate different and no designation.

**On-line Table 4: Quality measure of included studies by the Newcastle-Ottawa quality-assessment scale—prospective design (score 0–9)<sup>a</sup>**

| Study Name                           | Selection |   |   |   | Comparability |   | Outcome |   |   | Total |
|--------------------------------------|-----------|---|---|---|---------------|---|---------|---|---|-------|
|                                      | 1         | 2 | 3 | 4 | a             | b | 1       | 2 | 3 |       |
| Möhlenbruch et al 2017 <sup>28</sup> | *         |   | * | * |               | * | *       | * |   | 6     |
| Wakhloo et al 2015 <sup>29</sup>     | *         |   | * | * |               | * | *       | * |   | 6     |
| Lin et al 2018 <sup>32</sup>         | *         |   | * | * |               |   | *       | * |   | 5     |

<sup>a</sup> Newcastle-Ottawa quality-assessment scale for prospective studies. Studies with  $\geq 5$  asterisks were considered high-quality.

**Selection**

- 1) Representativeness of the exposed cohort
  - a) Truly representative of the average (patients treated with braided stents) in the community\*
  - b) Somewhat representative of the average (patients treated with braided stents) in the community\*
  - c) Selected group of users, eg, nurses, volunteers
  - d) No description of the derivation of the cohort
- 2) Selection of the nonexposed cohort
  - a) Drawn from the same community as the exposed cohort\*
  - b) Drawn from a different source
  - c) No description of the derivation of the nonexposed cohort
- 3) Ascertainment of exposure
  - a) Secure record (eg, surgical records)\*
  - b) Structured interview\*
  - c) Written self-report
  - d) No description
- 4) Demonstration that outcome of interest was not present at start of study
  - a) Yes\*
  - b) No

**Comparability**

- 1) Comparability of cohorts on the basis of the design or analysis
  - a) Study controls for \_\_\_\_\_ (select the most important factor)\*
  - b) Study controls for any additional factor\* (these criteria could be modified to indicate specific control for a second important factor)

**Note =**

Comparability (point a) was not tested because of the design of the reported studies

Comparability (point b) was tested comparing subgroups of analysis: One point was attributed if the study reported the analysis of the subgroups (aneurysm size, type of stents, and so forth) described in the On-line Table 6

**Outcome**

- 1) Assessment of outcome
  - a) Independent blind assessment\*
  - b) Record linkage\*
  - c) Self-report
  - d) No description
- 2) Was follow-up long enough for outcomes to occur  
(Adequate follow-up was considered a follow-up longer than the median follow-up time of the reported studies: mean radiologic follow-up, 11 mo; mean clinical follow-up, 11 months)
  - a) Yes (select an adequate follow-up period for outcome of interest)\*
  - b) No
- 3) Adequacy of follow-up of cohorts
  - a) Complete follow up: all subjects accounted for\*
  - b) Subjects lost to follow-up unlikely to introduce bias: small number lost (<20% of the original population) to follow-up or description provided of those lost\*
  - c) Follow-up rate (<80% of the original population) and no description of those lost
  - d) No statement

**On-line Table 5: Patient population and characteristics of AcomA aneurysms treated with flow-diverter stents**

| Variables                                        | Raw No. (%)                                       | No. of Articles | 95% CI |
|--------------------------------------------------|---------------------------------------------------|-----------------|--------|
| Population characteristics                       |                                                   |                 |        |
| No. of patients/aneurysms                        | 148                                               | 14              |        |
| Mean/median age (yr)                             | 57/57.5 (24–80)                                   | 9               |        |
| Proportion male                                  | 28/61 = 46%                                       | 4               | 34–58  |
| Aneurysm characteristics                         |                                                   |                 |        |
| Proportion of previously ruptured aneurysms      | 55/91 = 60.4%                                     | 8               | 50–70  |
| Proportion of aneurysms retreated with FD        | 54/107 = 50.4%                                    | 9               | 41–59  |
| Mean aneurysm size                               | 6.2 mm (median, 5.5; IQR, 5–7; range, 3–18)       | 10              |        |
| Treatment characteristics                        |                                                   |                 |        |
| Type of FD stent                                 |                                                   |                 |        |
| PED                                              | 97/148 = 65.6%                                    |                 | 57–72  |
| Silk                                             | 18/148 = 12.1%                                    |                 | 7–18   |
| FRED                                             | 21/148 = 14.2%                                    | 14              | 9–21   |
| Surpass                                          | 12/148 = 8.1%                                     |                 | 4.4–13 |
| No. of patients treated with multiple FDs        | 10/148 = 6.7%                                     | 14              | 3.5–12 |
| No. of aneurysms treated with additional coiling | 10/98 = 10.2%                                     | 9               | 5.4–17 |
| Radiologic follow-up (DSA) (mo)                  | Mean, 11 (range, 4–18)<br>Median, 12; IQR, 9.7–12 | 11              |        |
| Clinical follow-up (mo)                          | Mean, 11 (range, 6–19)<br>Median, 12; IQR, 6–12   | 6               |        |

**On-line Table 6: Factors related to aneurysm occlusion and treatment-related complications after flow-diversion treatment of unruptured AcomA aneurysms**

| Variables                  | Complete/<br>Near-Complete<br>Occlusion (95%CI)<br>(I <sup>2</sup> ) | No. of<br>Articles | P<br>Value | Treatment-Related<br>Complications (95%CI)<br>(I <sup>2</sup> ) | No. of<br>Articles | P<br>Value |
|----------------------------|----------------------------------------------------------------------|--------------------|------------|-----------------------------------------------------------------|--------------------|------------|
| Aneurysm-related factors   |                                                                      |                    |            |                                                                 |                    |            |
| Small-medium aneurysms     | 32/35 = 90%<br>(80–95) (I <sup>2</sup> = 0%)                         | 6                  |            | 2/35 = 7%<br>(2–16) (I <sup>2</sup> = 0%)                       | 6                  |            |
| Vs                         |                                                                      |                    | .07        |                                                                 |                    | .18        |
| Large-giant aneurysms      | 11/14 = 70%<br>(50–85) (I <sup>2</sup> = 42%)                        | 6                  |            | 3/14 = 20%<br>(5–30) (I <sup>2</sup> = 0%)                      | 6                  |            |
| Patient-related factors    |                                                                      |                    |            |                                                                 |                    |            |
| Younger than 60 yr         | 14/16 = 89%<br>(75–96) (I <sup>2</sup> = 93%)                        | 4                  |            | 1/16 = 7.5%<br>(2–28) (I <sup>2</sup> = 0%)                     | 4                  |            |
| Vs                         |                                                                      |                    | .7         |                                                                 |                    | .9         |
| Older than 60 yr           | 14/17 = 85%<br>(70–92) (I <sup>2</sup> = 0%)                         | 4                  |            | 1/17 = 7%<br>(3–17) (I <sup>2</sup> = 10%)                      | 4                  |            |
| Treatment-related factors  |                                                                      |                    |            |                                                                 |                    |            |
| Type of FD stent           |                                                                      |                    |            |                                                                 |                    |            |
| PED                        | 62/70 = 88.5%<br>(78–94)                                             | 7                  |            | 9/75 = 12%<br>(6–21)                                            | 8                  |            |
| FRED                       | 8/10 = 80%<br>(50–95)                                                | 2                  | >.05       | 3/21 = 14%<br>(4–30)                                            | 3                  | >.05       |
| Silk                       | 13/15 = 86.6%<br>(60–97)                                             | 2                  |            | 1/17 = 6%<br>(2–25)                                             | 2                  |            |
| Surpass                    | 8/9 = 88%<br>(54–98)                                                 | 1                  |            | 0/12 = 0%                                                       | 1                  |            |
| First treatment            | 29/32 = 89%<br>(79–98) (I <sup>2</sup> = 0%)                         | 6                  |            | 4/32 = 9%<br>(4–18) (I <sup>2</sup> = 70%)                      | 6                  |            |
| Vs                         |                                                                      |                    | .8         |                                                                 |                    | .7         |
| Retreatment                | 31/33 = 88%<br>(78–98) (I <sup>2</sup> = 0%)                         | 8                  |            | 2/33 = 7%<br>(2–21) (I <sup>2</sup> = 0%)                       | 8                  |            |
| Flow-diverter alone        | 44/48 = 91%<br>(84–98) (I <sup>2</sup> = 0%)                         | 7                  |            | 3/39 = 8%<br>(3–23) (I <sup>2</sup> = 0)                        | 6                  |            |
| Vs                         |                                                                      |                    | .7         |                                                                 |                    | .9         |
| Flow-diverter plus coiling | 15/16 = 88.5%<br>(75–97) (I <sup>2</sup> = 0%)                       | 4                  |            | 1/16 = 7%<br>(2–25) (I <sup>2</sup> = 46%)                      | 4                  |            |

**On-line Table 7: Outcomes after flow diversion of AcomA aneurysms related to type of dual AT before treatment**

| Outcomes                                                          | ASA, 81–160 mg, +<br>CP, 75 mg, 3–7 Days<br>before Treatment | ASA, 250–325 mg, +<br>CP, 75 mg, 3–7 Days<br>before Treatment | P<br>Value |
|-------------------------------------------------------------------|--------------------------------------------------------------|---------------------------------------------------------------|------------|
| Periprocedural treatment-related complications (95% CI) ( $I^2$ ) | 1/20 = 5%<br>(4–15) ( $I^2$ = 0%)<br>(3 articles)            | 3/40 = 6%<br>(2–14) ( $I^2$ = 0%)<br>(4 articles)             | .8         |

**On-line Table 8: Outcomes after flow diversion of AcomA aneurysms related to the type of dual AT after treatment**

| Outcomes                                                   | ASA, 81–100 mg, +<br>CP, 75 mg,<br>for 3–6 mo          | ASA, 160–300 mg, +<br>CP, 75 mg,<br>for 3–6 mo       | P<br>Value |
|------------------------------------------------------------|--------------------------------------------------------|------------------------------------------------------|------------|
| Delayed treatment-related complications (95% CI) ( $I^2$ ) | 0/23 = 0%<br>(3 articles)                              | 1/28 = 3.5%<br>(3–11) ( $I^2$ = 0%)<br>(3 articles)  | .36        |
| Complete/near-complete occlusion (95% CI) ( $I^2$ )        | 28/29 = 94.5%<br>(86–98) ( $I^2$ = 0%)<br>(3 articles) | 17/19 = 88%<br>(76–94) ( $I^2$ = 0%)<br>(3 articles) | .41        |

**On-line Table 9: Outcomes after flow diversion of AcomA aneurysms related to the duration of dual AT after treatment**

| Outcomes                                            | Dual AT (ASA + CP)<br>until 3 mo                     | Dual AT (ASA + CP)<br>until 6 mo                     | P<br>Value |
|-----------------------------------------------------|------------------------------------------------------|------------------------------------------------------|------------|
| Treatment-related complications (95% CI) ( $I^2$ )  | 2/30 = 5%<br>(3–12) ( $I^2$ = 0%)<br>(3 articles)    | 5/54 = 6.5%<br>(4–13) ( $I^2$ = 0%)<br>(3 articles)  | .77        |
| Complete/near-complete occlusion (95% CI) ( $I^2$ ) | 25/27 = 93%<br>(83–98) ( $I^2$ = 0%)<br>(3 articles) | 20/22 = 91%<br>(82–98) ( $I^2$ = 0%)<br>(3 articles) | .8         |

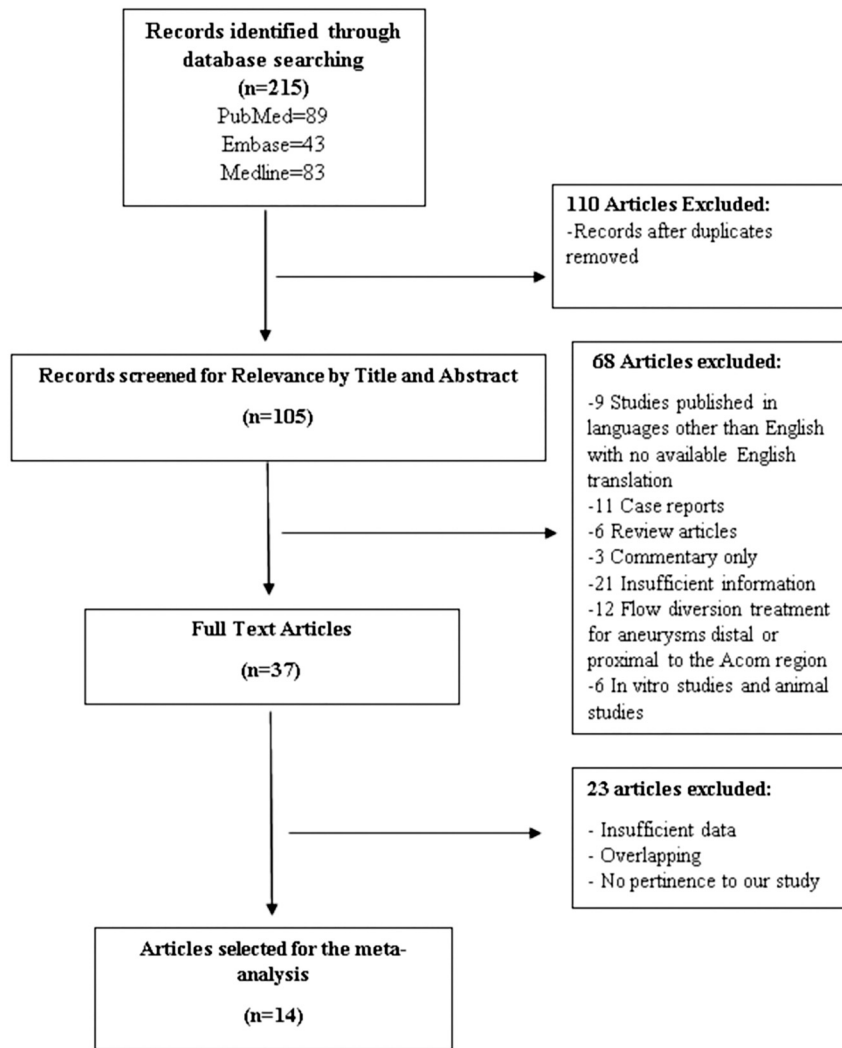

**ON-LINE FIG 1.** PRISMA diagram detailing the specifics of the systematic literature review.

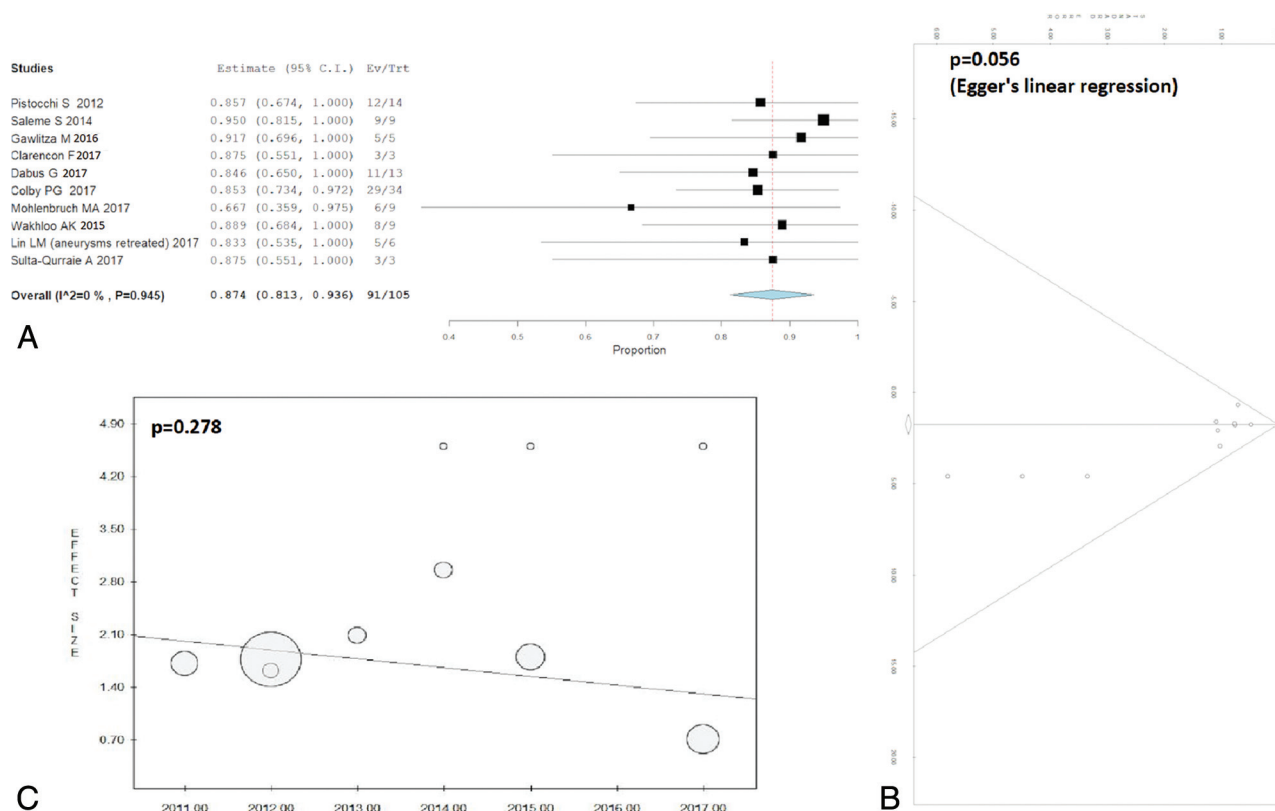

**ON-LINE FIG 2.** Forest plot demonstrating the overall rate of AcomA aneurysm occlusion after flow diversion (A). Meta-regression shows a nonsignificant variation of the effect size (B). The funnel plot followed by the Egger linear regression test excludes publication bias (C).

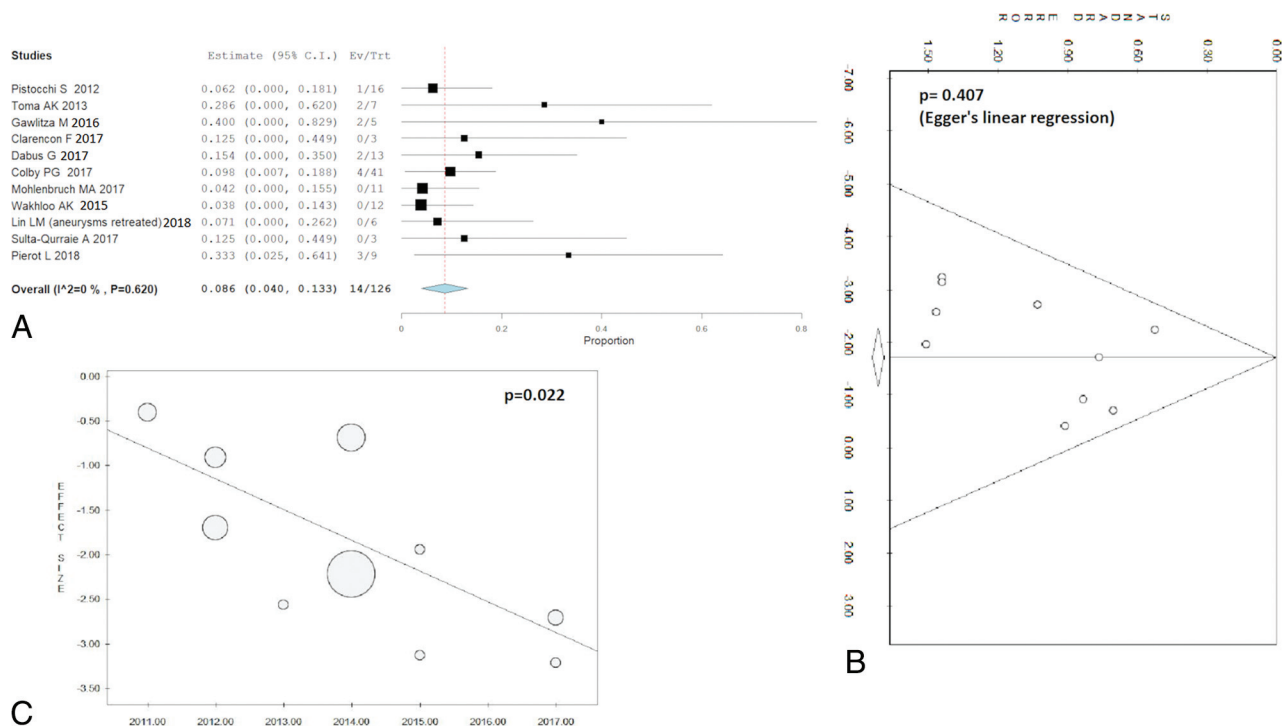

**ON-LINE-FIG 3.** Forest plot demonstrating the overall rate of treatment-related complications after flow diversion of AcomA intracranial aneurysms (A). Meta-regression shows a significant variation of the effect size (B). The funnel plot followed by the Egger linear regression test excludes publication bias (C).
